# Supplementary material
Source: PubMed Central journal article supplement (PMC3417113)
Supplement: NIHMS295456-supplement-01.pdf [file NIHMS295456-supplement-01.pdf]

## Supplemental Information

### A Eubacterial Riboswitch Class That Senses the Coenzyme Tetrahydrofolate

Tyler D. Ames, Dmitry A. Rodionov, Zasha Weinberg, and Ronald R. Breaker

#### SUPPLEMENTAL EXPERIMENTAL PROCEDURES

##### *Discovery and refinement of the THF motif*

The THF aptamer motif was detected using a computational pipeline described previously<sup>1</sup>. Briefly, an early version of a method to cluster intergenic regions by sequence similarity<sup>2</sup> was applied to genomes of lactic acid bacteria from RefSeq<sup>3</sup> version 25. Conserved RNA structures were predicted in these clusters using CMfinder<sup>4</sup> and automated homology searches performed using RAVENNA<sup>5,6</sup>. Also, the conserved structure of the RNA element was refined by manual covariance analysis using multiple alignment of upstream regions of *folT* genes from Firmicutes and the Mfold RNA folding algorithm<sup>7</sup>. Manual homology searches also using RAVENNA and improvements to the structural model were then conducted. Ultimately, we searched the microbial subsets of RefSeq version 32, and metagenome DNA sequences isolated from acid mine drainage<sup>8</sup>, soil and whale fall<sup>9</sup>, human gut<sup>10,11</sup>, mouse gut<sup>12</sup>, gutless sea worms<sup>13</sup>, sludge<sup>14</sup>, Global Ocean Survey scaffolds<sup>15,16</sup>, other marine sequences<sup>17</sup>, and termite hindgut<sup>18</sup>. The degree of conservation and covariation at different positions on the structure shown in Figure 1A and Figure S1 was calculated using the Infernal<sup>19</sup> implementation of the GSC algorithm<sup>20</sup>, with previously established protocols<sup>1</sup>.

##### *Chemicals and DNA oligonucleotides*

All folate, dihydrofolate (DHF), tetrahydrofolate (THF), and modified THF derivatives were provided as a gift from Merck Eprova. An additional tetrahydrofolate sample was purchased from Sigma-Aldrich, which was used as noted. Other compounds used as ligands in in-line probing assays were supplied by Sigma-Aldrich. DNA oligonucleotides were prepared by Sigma-Genosys.

##### *RNA Preparation*

The following synthetic DNAs were used to generate double-stranded (ds) DNA templates for *in vitro* transcription.

1: 5'-

TAATACGACTCACTATAGGGTATGAAGGCAGAGTAGGTGTTATGCGTTAAGTGTTAGGGGAT  
GGGAAGTT

2: 5'-

TAATACGACTCACTATAGGGTATGAAGGCAGAGTAGGACATATGCGTTAAGTGTTAGGGGA  
TGGGAAGTT

3: 5'-

TAATACGACTCACTATAGGGTATGAAGGCAGAGTAGGTGTTATGCGTTAAGTGTTTCCGGAT  
GGGAAGTT

4: 5'-TAATACGACTCACTATAGGGGGTGTATGCGTTAAGTGTAGGGGATGGGAAGTT

5: 5'-

CTGTGACAGTGGACGCGGTGTTATATCGCGAAATGAGTTCTTCGTTTAGGAGCAACTTCCCA  
TCCCCT

6: 5'-

CTGTGACAGTGGACGCGGTGTTATATCGCGAAATGAGTTCTTCGTTTAGGAGCAACTTCCCA  
TCCGGA

7: 5'-

CTGTGACAGTGGACGCGGACATATATCGCGAAATGAGTTCTTCGTTTAGGAGCAACTTCCCA  
TCCCCT

8: 5'-

CTGTGACAGTGGACGCGGTGTTATATCGCGAAATGAGTTCTTCGTTTTCCAGCAACTTCCCAT  
CCGGA

9: 5'-GGTGTTATATCGCGAAATGAGTTCTTCGTTTAGGAGCAACTTCCCATCCCCT

DNAs 1 and 5 were used to make dsDNA template for the 106 *folC* RNA, 2 and 5 for M1, 3 and 6 for M2, 2 and 7 for M3, 3 and 8 for M4, and 4 and 9 for M5. To generate full length dsDNA templates, 300 pmoles of each primer were added to a 100  $\mu$ L reaction containing 50 mM Tris-HCl (pH 8.3 at 23°C), 75 mM KCl, 3 mM MgCl<sub>2</sub>, 10  $\mu$ M dithiothreitol (DTT), 1 mM of each of the four deoxynucleoside 5'-triphosphates (dNTPs), and 800 units of SuperScript II Reverse Transcriptase (RT) (Invitrogen). The solution was incubated at 42°C for 2 hours.

A 15  $\mu$ L aliquot of the from the RT reaction was used to supply template for a 100  $\mu$ L transcription reaction which contained 80 mM HEPES-KOH (pH 7.5 at 23°C), 24 mM MgCl<sub>2</sub>, 2 mM spermidine, 40 mM DTT, 2.5 mM each of the four ribonucleoside 5'-triphosphates (NTPs), and T7 RNA polymerase (final concentration of 10 units  $\mu$ L<sup>-1</sup>). Samples were heated for 2 hours at 37°C. RNA was purified using the QIAquick Nucleotide removal Kit (Qiagen).

### *In-line probing assays*

In-line probing analyses were conducted using methods similar to those described previously<sup>21</sup>. RNA transcripts were dephosphorylated using alkaline phosphatase (Roche) according to the manufacturer's protocol. The RNAs were subsequently 5' labeled with [ $\gamma$ -<sup>32</sup>P] ATP using T4 polynucleotide kinase (New England Biolabs) according to the manufacturer's instructions. Radiolabeled RNAs were then purified via denaturing (8 M urea) 6% polyacrylamide gel electrophoresis (PAGE), and desired products were eluted from the gel using 10 mM Tris-HCl (pH 7.5 at 23°C), 200 mM NaCl and 1 mM EDTA (pH 8.0 at 23°C). The purified radiolabeled RNAs were then incubated for approximately 40 hours at 23°C in a solution composed of 50 mM Tris-HCl (pH 8.3 at 23°C), 20 mM MgCl<sub>2</sub>, 100 mM KCl, and varying concentrations of THF or other potential ligands (folate, DHF, etc). In some in-line probing reactions, such as those used in Figure 2 of the main text, 1 mM DTT was added to avoid excessive breakdown of some of the compounds examined as potential ligands<sup>22</sup>.

The resulting RNA degradation products were separated via denaturing 10% PAGE and imaged using a Molecular Dynamics PhosphorImager (GE Healthcare). Band intensities were quantified using SAFA v1.1 software<sup>23</sup>. Groupings of consecutive positions of the twenty bands which modulated the greatest were used to make  $K_D$  estimates. Other positions of decreasing, increasing, or constant cleavage indicated in Figure 2A on the structural model were visually identified from the gel image.

### Figure S1. Multiple sequence alignment of the THF aptamer

Individual sequences are putative THF aptamers. Accession numbers for bacterial species and environmental sequences are shown in the left column, followed by the nucleotide coordinates of the aptamer. Colored positions of the sequences indicate areas involved in predicted base paired elements. Gray positions represent nucleotides that are mismatched. Based paired areas are additionally indicated in the fifth line from the bottom with angle brackets. In the fourth to the last line, a “2” denotes a positions containing a covarying mutation, and a “?” indicates a positions where the predicted base pair is broken > 10% of the time with non-Watson-Crick or G-U pairings. The last line contains the consensus sequence. Annotations for this line are as follows: “R” = “A” or “G”, “Y” = “C” or “U”. Red nucleotides are conserved in at least 97% of the representatives; black nucleotides: 90%; gray nucleotides: 75%. Red, black and gray shading indicate that a nucleotide of any identity (n) is present in at least 97%, 90%, or 75% of the representatives, respectively. Duplicate representatives (see below) with identical sequences to another THF aptamer hit are excluded in the alignment and in the analysis of nucleotide representation.

Duplicates are listed in pairs, where the hit (or hits) not represented in the alignment is (are) listed after its identical representative. Hits are separated by “=”.

NC\_009442.1/125748-125890 = NC\_009443.1/125651-125793

NC\_008526.1/2247840-2247748 = NZ\_ABQV01000046.1/83746-83654

BABB01000157.1/63-158 = BABD01002599.1/316-411

BAAX01002679.1/2103-2006 = BABG01001398.1/1123-1026 = BABG01002228.1/1277-1180

NC\_004668.1/903576-903739 = NZ\_ABPI01000001.1/702486-702649

NZ\_AAAK03000102.1/3116-3216 = BABC01004059.1/195-295 = BABC01009447.1/651-751

NZ\_ABCA03000044.1/64560-64460 = BABG01026547.1/439-539 = BABG01026548.1/657-557

NC\_009699.1/914572-914676 = NC\_010516.1/904741-904845 = NC\_010520.1/924118-924222 = NZ\_ABDO02000001.1/854207-854311 = NZ\_ABDP01000015.1/2757-2861

NC\_009495.1/892227-892331 = NC\_009697.1/864554-864658 = NC\_009698.1/864721-864825

NZ\_ABED02000024.1/137574-137672 = hgutS7\_s7\_175872/176-78

NC\_010609.1/1983266-1983360 = NC\_009513.1/1943850-1943944

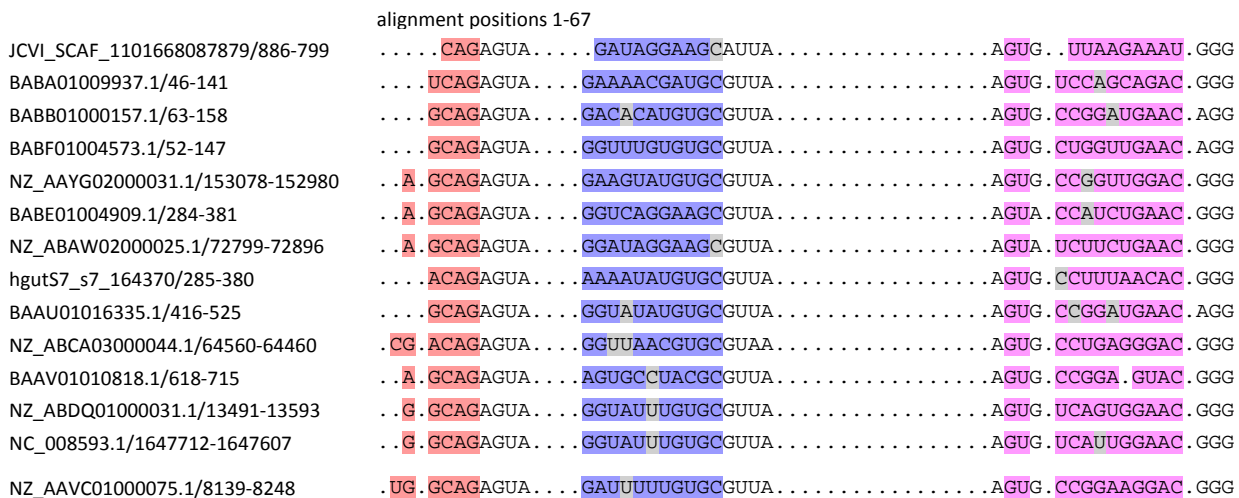





JCVI\_SCAF\_1101668087879/886-799 .....GCUAUGAUUUUCUGUC.GCAACCG.CUG.....

BABA01009937.1/46-141 .....GCUUGCGUAUCGUUUUCGCAUCCCGCUGA.....

BABB01000157.1/63-158 .....CUUGCGGUACAUGAGUCGCAUCCCGCUGC.....

BABF01004573.1/52-147 .....CUUGCGGUACACGAAUCGCAUCCCGCUGC.....

NZ\_AAYG02000031.1/153078-152980 .....GCUUGCGGUACAUAUUUCGCAUCCCGCUGC.U..

BABE01004909.1/284-381 .....CUUGCGGUUUCGUGUCGCAUCCCGCUGU.U..

NZ\_ABAW02000025.1/72799-72896 .....UCUUGCGAUUUCUUAUCCGCAUCCCGCUGU.U..

hgutS7\_s7\_164370/285-380 .....CUUGCGGUACAUAUUUCGCAUCCCGCUGU.....

BAAU01016335.1/416-525 .....UGU.....UCCUGCGGUACAUGAGCCGCAUCCCGCUGC.....

NZ\_ABCA03000044.1/64560-64460 .....GGUGCGGUACGUUUUCGCAUCCCGCUGU.UG.

BAAV01010818.1/618-715 .....GGCUGCGGUGUAAGCAUUGCAUCCCGCUGC.U..

NZ\_ABDQ01000031.1/13491-13593 .....UCAUUUGCGGUGCAUAUAUCGCAUCCCGCUGC.C..

NC\_008593.1/1647712-1647607 .....UUAUUUGCGGUGCAUAUAUCGCAUCCCGCUGC.C..

NZ\_AAVC01000075.1/8139-8248 .....UAUUGUUUGCGGUACAAUAUCGCAUCCCGCUGC.CA..

BABG01026644.1/586-688 .....GGGUUUGCGGUGCAUAUUCGCAUCCCGCUGC.....

BAA01022545.1/141-43 .....GCCGCGGUGCAGGGUCUGCAUCCCGCUG.CUG.

NZ\_ABED02000024.1/137574-137672 .....ACCGCGGUGCAGGGUCUGCAUCCCGCUG.CUG.

BABG01004557.1/3-100 .....CCGCGGUGCAUGGUCUGCAUCCCGCUG.CUG.

BAA01002679.1/2103-2006 .....CCCGCGGUGCAUGGUCUGCAUCCCGCUG.CUG.

BAAU01000940.1/627-724 .....CCCGCGGUGCAUGGUCUGCAUCCCGCUG.CUG.

BABE01017430.1/618-522 .....CUUACGUAUAUAUUCGCAUCCCGCUGC.A..

NZ\_AAVO02000004.1/164832-164736 .....CUUACGUAUAUAUUCGCAUCCCGCUGC.A..

BABE01001528.1/194-88 .....CUGCUUACGAUAUAUUUCGCAUCCCGCUGC.UA..

hgutS8\_s8\_179091/613-719 .....CUGCUUACGAUAUAUUUCGCAUCCCGCUGC.UA..

hgutS7\_s7\_164211\_1/947-835 CGGA.....CUUACGAUAUGGUUACGCAUCCCGCUGC.A..

NC\_004350.1/559729-559641 .....GCGCGGUGAAUCAUUGCAUCCCGCUGC.....

NC\_009633.1/4463946-4464038 .....UUCGCGAUUAACACCGCGUCCA.CUGC.C..

NC\_003030.1/2534634-2534731 .....CUUGCGGUUCAUAUUCGCAUCCCGCUGC.UAC

NZ\_ABE02000015.1/221133-221224 .....CUCGUGGUUAGUUUCGCAUCCCGCUGC.U..

NC\_009633.1/4839802-4839709 .....GCUUGCGCAUAUAUAUUGCAUCCCGCUGC.U..

NC\_009922.1/2619446-2619544 .....GUACUAUUUGCGGUGCAUAUUCGCAUCCCGCUGC.....

NZ\_AAOZ01000019.1/12278-12377 .....GGCUGCGGUAUAGCCACCGCGUCCG.CUGC.C..

NC\_004557.1/1800312-1800211 .....GGAUUUUGCGAUGCAUAUACCGCAUCCCGCUGC.C..

NZ\_AAPZ02000001.1/1062273-1062367 .....UAGCUGC.UUUGUUUUCGCAUCCCGCUGC.C..

NC\_010609.1/1983266-1983360 .....AGCUGC.UUUGUUUUCGCAUCCCGCUGC.C..

NC\_008497.1/852209-852116 .....GCCC GCGAUUUUAUUUCGCAUCCCGCUGC.C..

NC\_007576.1/348925-349019 .....UGCUCGCGGUUUUAGUCCCGCAUCCCGCUGC.C..

NC\_008526.1/2247840-2247748 .....GUCGCGGUGCAGGUGCCGCAUCCCGCUGC.C..

NZ\_AAAK03000102.1/3116-3216 .....GUUCGCGGUUUUAUUUCGCAUCCCGCUGC.CAU..

NZ\_ABCC02000039.1/266095-266205 UGUC.....UGCGGUACAUAUUCGCAUCCCGCUGC.....

NC\_009706.1/3903929-3904044 .....GGGCUUACGUAACAAGGUUCGCAUCCCGCUGC.U..

BABD01033677.1/236-329 .....GCCCCGCGGUGCUGUUGCCGCAUCCCGCUGC.....

BAAZ01000245.1/2377-2470 .....GCUCCGCGAUACGGUUAUCCGCAUCCCGCUGC.....

NC\_008525.1/1424554-1424642 .....CAGCGAUUAUUGCAUCCCGCUGC.....

hgutS7\_s7\_171496/2250-2148 .....GGCUUACGUGCGCAUCCCGCAUCCCGCUGC.....

NC\_007929.1/1666649-1666554 .....GACUUAGCGUUUGGUUUCGCAUCCCGCUGC.....

NC\_009706.1/1524321-1524441 .....AUA.....AG.AUUUAAAGCUUACGAUAUAUAUUGCAUCCCGCUGC.UAU

NZ\_AAXG02000014.1/43071-43187 .....GGCUUGCAUACGCCUCCGCAUCCCGCUGC.C..

NC\_009699.1/914572-914676 .....AAGAUUUGCGAUGU.GUUACCGCAUCCCGCUGC.UAC

NC\_009495.1/892227-892331 .....AAGAUUUGCGAUGUG.UUACCGCAUCCCGCUGC.UAC

NC\_008531.1/123971-124060 .....UUGCUAUCAUUUU.UUCGUGUUAG.C.....

BAAZ01020636.1/794-894 .....UUUAUGCCUUAUUUAUUUCGCAUCCCGCUAAGA..

NZ\_AASF01001777.1/1578-1480 .....GCCAGUGCCGUGCCUGCGCCUAUUUGGCCGU..

hgutS7\_s7\_168056/60-187 CAU.....CCCGUCUGCGGUACGGAAGCUUCCGCAUCCCGCUGC.CU..

BABA01028836.1/106-1 .....GCCUACGAUAUUUACCGGUCGUCGCGCUGC.....

NC\_009442.1/125748-125890 .....AC..AUU..GGUCCU.....GGCUGAGAGUAGCGGUAAACCAUU..GCAUCCCGCUGC.....

NC\_004668.1/903576-903739 UAUCAUACAGAAACAACACGUUCAGCUUUUUAAGUUUCGCGUUUUUUUUUCGCAUCCCGCUGC.....



**Figure S3. The THF riboswitch aptamer can bind dihydrofolate (DHF) and tetrahydrobiopterin (THBP)**

(a) In-line probing analysis of the *A. metalliredigens* 106 *folT* RNA using the compounds DHF and THBP as ligands. The NR, T1 and  $\bar{\text{OH}}$  lanes were loaded, respectively, with 5'  $^{32}\text{P}$ -labeled precursor (Pre) RNAs subjected to no reaction, partial digestion with RNase T1 (cleaves after G residues), and partial digestion under alkaline conditions (cleaves at every position). Other lanes include Pre RNAs subjected to in-line probing reaction conditions without any additional compound (-) or with increasing concentrations of DHF or THBP (1 nM through 10  $\mu\text{M}$  from left to right). Vertical lines identify bands that were quantitated and used to estimate  $K_D$  values in b.

(b) Plot of the normalized band intensities (normalized to the intensity measured at 1 nM ligand) versus the logarithm of the concentration of ligand. The solid line represents a theoretical binding curve for a one-to-one interaction with a  $K_D$  of 300 nM.

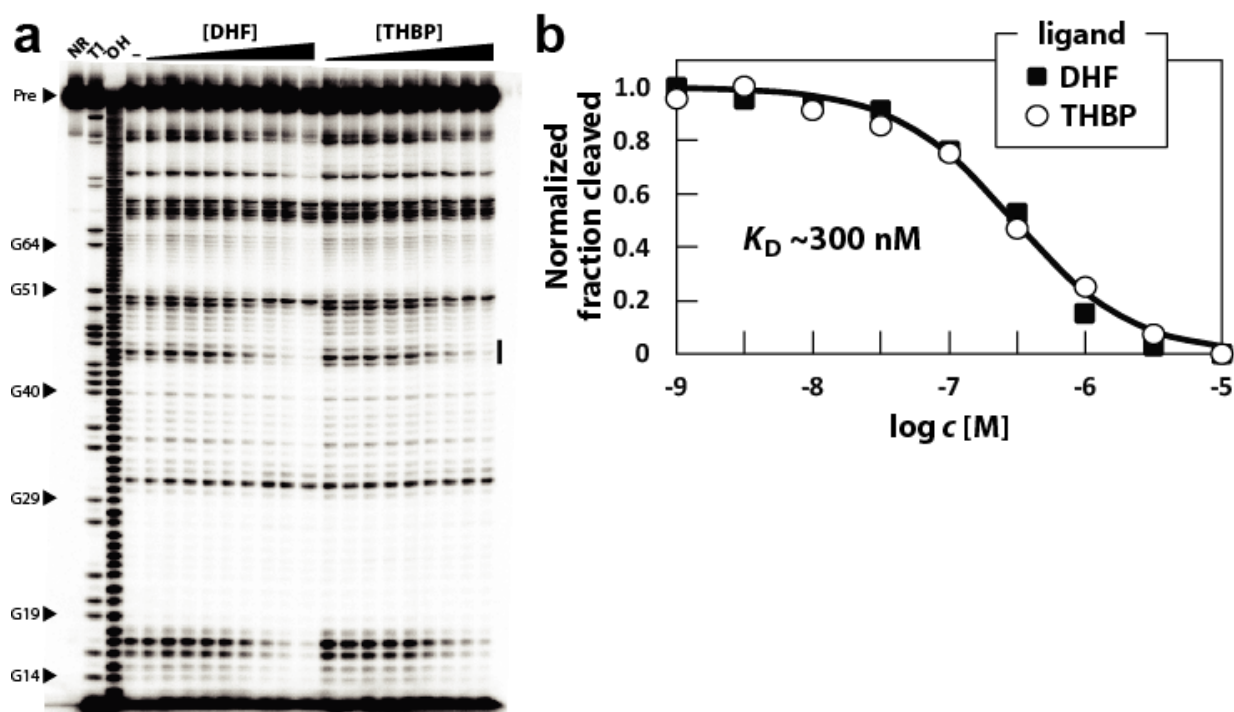



### Figure S4. Disruption of predicted base-paired regions of the THF aptamer interferes with ligand binding

In-line probing analyses using THF as a ligand with the RNA constructs (a) M1, (b) M2, (c) M3, and (d) M4. THF concentrations range from 100 nM to 1 mM. (e) Plot of the normalized band intensities versus the logarithm of the concentration of THF. The solid lines represent a theoretical binding curve for a one-to-one interaction with  $K_D$  values of 1  $\mu$ M and 80  $\mu$ M. Other details are as described in the legend to Figure S3. M2 is not represented on this graph as there was no evidence of it being able to bind to THF.

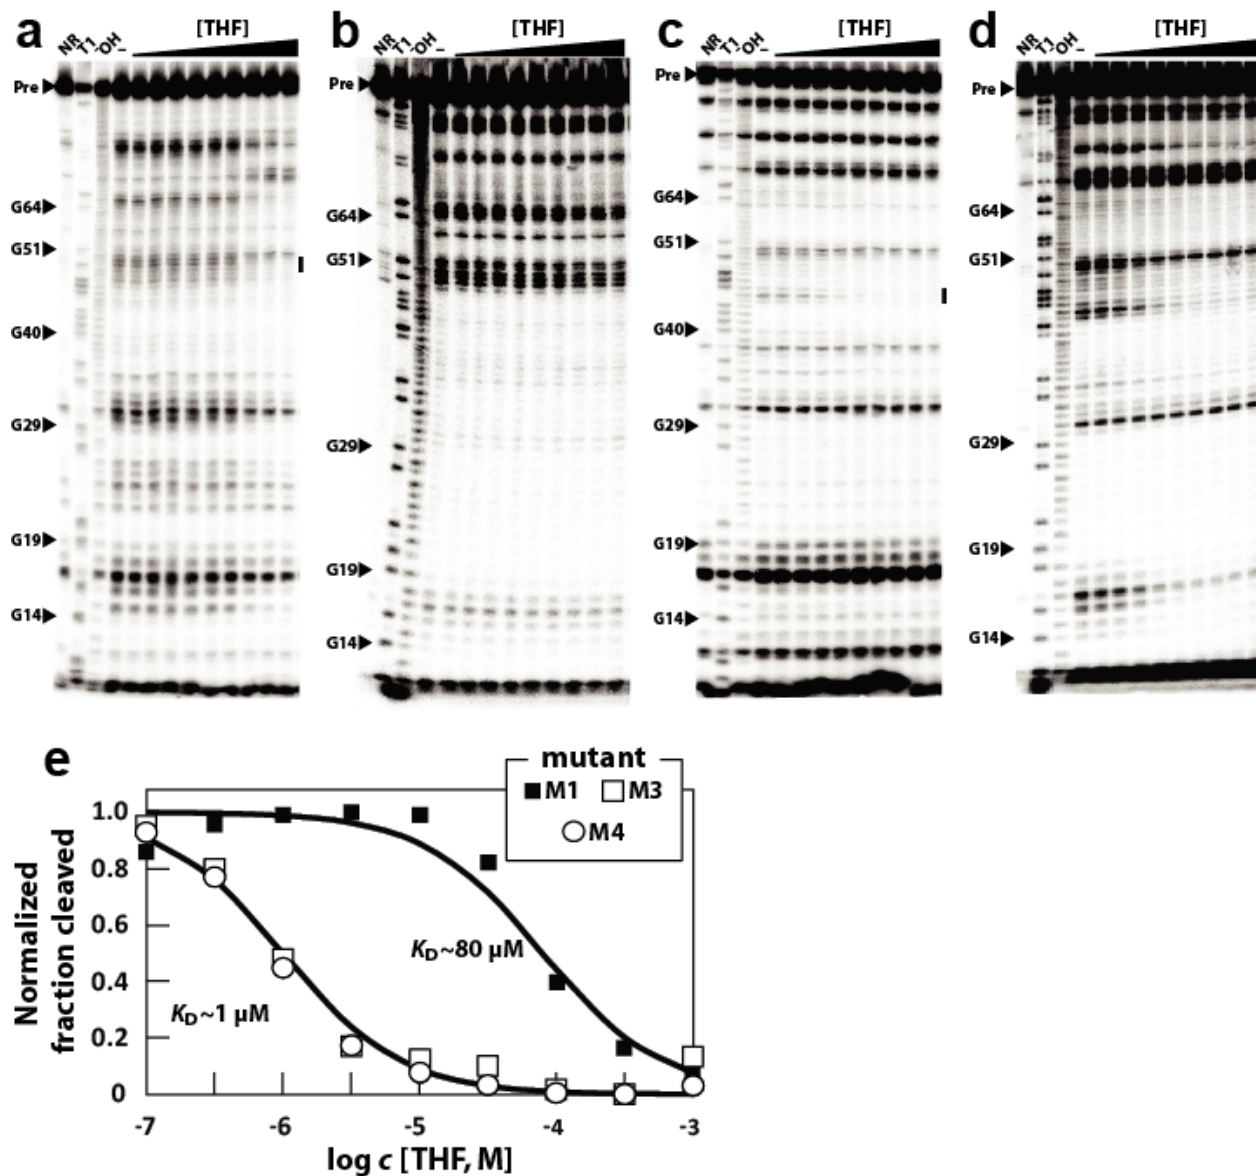

**Table S1. THF riboswitch-containing genomic loci and predicted target genes in microbial genomes and metagenomes**

| Nucleotide ID in Genbank        | Organism                                                 | Target gene (operon)        | Locus tag for target gene |
|---------------------------------|----------------------------------------------------------|-----------------------------|---------------------------|
| NC_009633.1/4463946-4464038     | Alkaliphilus metalliredigens QYMF                        | <i>foIT</i>                 | Amet_4324                 |
| NC_009633.1/4839802-4839709     | Alkaliphilus metalliredigens QYMF                        | <i>foIT</i>                 | Amet_4715                 |
| NC_009922.1/2619446-2619544     | Alkaliphilus oremlandii OhLAs                            | <i>foIT</i>                 | Clos_2421                 |
| NZ_AAXG02000014.1/43071-43187   | Bacteroides capillosus ATCC 29799                        | <i>foIT</i>                 | BACCAP_02343              |
| NC_003030.1/2534634-2534731     | Clostridium acetobutylicum ATCC 824                      | <i>foIT</i>                 | CAC_2418                  |
| NZ_ABCC02000039.1/266095-266205 | Clostridium bolteae ATCC BAA-613                         | <i>foIT</i>                 | CLOBOL_05170              |
| NC_009495.1/892227-892331       | Clostridium botulinum A str. ATCC 3502                   | <i>foIT</i>                 | CBO0790                   |
| NZ_ABDQ01000031.1/13491-13593   | Clostridium botulinum C str. Eklund                      | <i>foIT</i>                 | CBC_A0291                 |
| NC_009699.1/914572-914676       | Clostridium botulinum F str. Langeland                   | <i>foIT</i>                 | CLI_0876                  |
| NC_009706.1/3903929-3904044     | Clostridium kluyveri DSM 555                             | <i>foIT</i>                 | CKL_3856                  |
| NC_009706.1/1524321-1524441     | Clostridium kluyveri DSM 555                             | <i>foIT</i>                 | CKL_1477                  |
| NC_008593.1/1647712-1647607     | Clostridium novyi NT                                     | <i>foIT</i>                 | NT01CX_2426               |
| NC_004557.1/1800312-1800211     | Clostridium tetani E88                                   | <i>foIT</i>                 | CTC01689                  |
| NC_004668.1/903576-903739       | Enterococcus faecalis V583                               | <i>foIT</i>                 | EF0940                    |
| NZ_AAAK03000102.1/3116-3216     | Enterococcus faecium DO                                  | <i>foIT</i>                 | Efae_0455                 |
| NZ_ABAW02000025.1/72799-72896   | Eubacterium dolichum DSM 3991                            | <i>foIT</i>                 | EUBDOL_02148              |
| NZ_ABCA03000044.1/64560-64460   | Eubacterium siraeum DSM                                  | <i>foIT</i>                 | EUBSIR_01228              |
| NZ_ABED02000024.1/137574-137672 | Faecalibacterium prausnitzii M21/2                       | <i>foIT-foIC</i>            | FAEPRAM212_01335          |
| NC_008497.1/852209-852116       | Lactobacillus brevis ATCC 367                            | <i>foIT</i>                 | LVIS_0823                 |
| NC_008526.1/2247840-2247748     | Lactobacillus casei ATCC 334                             | <i>foIT</i>                 | LSEI_2252                 |
| NC_010609.1/1983266-1983360     | Lactobacillus reuteri JCM 1112                           | <i>foIT</i>                 | LAR_1766                  |
| NC_007576.1/348925-349019       | Lactobacillus sakei subsp. sakei 23K                     | <i>foIT</i>                 | LSA0348                   |
| NC_007929.1/1666649-1666554     | Lactobacillus salivarius UCC118                          | <i>foIT</i>                 | LSL_1584                  |
| NC_008531.1/123971-124060       | Leuconostoc mesenteroides subsp. mesenteroides ATCC 8293 | <i>foIT</i>                 | LEUM_0142                 |
| NZ_ABEE02000015.1/221133-221224 | Parvimonas micra ATCC 33270                              | <i>foIT</i>                 | PEPMIC_00447              |
| NC_008525.1/1424554-1424642     | Pediococcus pentosaceus ATCC 25745                       | <i>foIT</i>                 | PEPE_1451                 |
| NZ_AAYG02000031.1/153078-152980 | Ruminococcus gnavus ATCC 29149                           | <i>foIT</i>                 | RUMGNA_03422              |
| NZ_AAVO02000004.1/164832-164736 | Ruminococcus obeum ATCC 29174                            | <i>foIE-foIQ-foIP-foIBK</i> | RUMOBE_01496              |
| NC_004350.1/559729-559641       | Streptococcus mutans UA159                               | <i>foIT</i>                 | SMU.600c                  |
| NC_009442.1/125748-125890       | Streptococcus suis 05ZYH33                               | <i>foIT-foIC</i>            | SSU05_0136                |
| hgutS7_s7_164370/285-380        | human distal gut microbiome                              | <i>foIT</i>                 |                           |
| hgutS8_s8_179091/613-719        | human distal gut microbiome                              | <i>foIT</i>                 |                           |
| hgutS7_s7_164211_1/947-835      | human distal gut microbiome                              | <i>foIE</i>                 |                           |
| hgutS7_s7_171496/2250-2148      | human distal gut microbiome                              | <i>foIT</i>                 |                           |
| hgutS7_s7_168056/60-187         | human distal gut microbiome                              | <i>foIT</i>                 |                           |
| BABA01009937.1/46-141           | human gut metagenome                                     | <i>foIT</i>                 |                           |
| BABB01000157.1/63-158           | human gut metagenome                                     | <i>foIT</i>                 |                           |
| BABF01004573.1/52-147           | human gut metagenome                                     | <i>foIT</i>                 |                           |
| BABE01004909.1/284-381          | human gut metagenome                                     | <i>foIT</i>                 |                           |
| BAAU01016335.1/416-525          | human gut metagenome                                     | -                           |                           |
| BAAV01010818.1/618-715          | human gut metagenome                                     | <i>foIT</i>                 |                           |
| BABG01026644.1/586-688          | human gut metagenome                                     | <i>foIT</i>                 |                           |
| BAAX01022545.1/141-43           | human gut metagenome                                     | -                           |                           |
| BABG01004557.1/3-100            | human gut metagenome                                     | <i>foIT-foIC</i>            |                           |
| BAAX01002679.1/2103-2006        | human gut metagenome                                     | <i>foIT</i>                 |                           |
| BAAU01000940.1/627-724          | human gut metagenome                                     | <i>foIT-foIC</i>            |                           |
| BABE01017430.1/618-522          | human gut metagenome                                     | <i>foIE</i>                 |                           |
| BABE01001528.1/194-88           | human gut metagenome                                     | -                           |                           |
| BABD01033677.1/236-329          | human gut metagenome                                     | -                           |                           |
| BAAZ01000245.1/2377-2470        | human gut metagenome                                     | <i>foIT</i>                 |                           |

|                                 |                      |      |
|---------------------------------|----------------------|------|
| BAAZ01020636.1/794-894          | human gut metagenome | -    |
| BABA01028836.1/106-1            | human gut metagenome | -    |
| JCVI_SCAF_1101668087879/886-799 | marine metagenome    | foIT |

1. Weinberg, Z., Wang, J.X., Bogue, J., Yang, J., Corbino, K.A., Moy, R.H., & Breaker, R.R. *Genome Biol.* (2010). (submitted)
2. Tseng, H., Weinberg, Z., Gore, J., Breaker, R.R. & Ruzzo, W.L. *J. Bioinform. Comput. Biol.* **7**, 373-388 (2009).
3. Pruitt, K.D., Tatusova, T. & Maglott, D.R. *Nucleic Acids Res.* **33**, D501-504 (2005).
4. Yao, Z., Weinberg, Z. & Ruzzo, W.L. *Bioinformatics* **22**, 445-452 (2006).
5. Weinberg, Z. & Ruzzo, W.L. *Bioinformatics* **22**, 35-39 (2006).
6. Eddy, S.R. & Durbin, R. *Nucleic Acids Res.* **22**, 2079-2088 (1994).
7. Zuker, M. *Nucleic Acids Res.* **31**, 3406-3415 (2003).
8. Tyson, G.W. *et al. Nature* **428**, 37-43 (2004).
9. Tringe, S.G. *et al. Science* **308**, 554-557 (2005).
10. Gill, S.R. *et al. Science* **312**, 1355-1359 (2006).
11. Kurokawa, K. *et al. DNA Res.* **14**, 169-181 (2007).
12. Turnbaugh, P.J. *et al. Nature* **444**, 1027-131 (2006).
13. Woyke, T. *et al. Nature* **443**, 950-955 (2006).
14. García Martín, H. *et al. Nat. Biotechnol.* **24**, 1263-1269 (2006).
15. Rusch, D.B. *et al. PLoS Biol.* **5**, e77 (2007).
16. Venter, J.C. *et al. Science* **304**, 66-74 (2004).
17. Konstantinidis, K.T., Braff, J., Karl, D.M. & DeLong, E.F. *Appl. Environ. Microbiol.* **75**, 5345-5355 (2009).
18. Warnecke, F. *et al. Nature* **450**, 560-565 (2007).
19. Eddy, S.R. <ftp://ftp.genetics.wustl.edu/pub/eddy/software/infernal/Userguide.pdf> (2005).
20. Gerstein, M., Sonnhammer, E.L. & Chothia, C. *J. Mol. Biol.* **236**, 1067-1078 (1994).
21. Soukup, G.A. & Breaker, R.R. *RNA* **5**, 1308-1325 (1999).
22. Lucock, M.D., Green, M., Hartley, R. & Levene, M.I. *Food Chemistry* **47**, 79-86 (1993).
23. Das, R., Laederach, A., Pearlman, S.M., Herschlag, D. & Altman, R.B. *RNA* **11**, 344-354 (2005).
24. Felsenstein, J. *Cladistics* **5**, 164-166 (1989).
